# Supplementary material for: Effect of hydrophobic nanopatches within an ionic surface on the structure of liquids
Source: Royal Society of Chemistry journal article supplement (doi:10.1039/c0cp01838d), 2010-11-01
Supplement: c0cp01838d.pdf [file c0cp01838d.pdf]

## Supplementary Information

### Theoretical Methods

Molecular dynamics simulations of liquid thin films over model ionic lattice surfaces have been conducted with the DL\_POLY software.[1] The general setup consists of an orthorhombic cell of dimensions  $32 \times 32 \times 80$  Å in which a surface comprising five atomic layers (total width 8 Å) is positioned in the  $xy$  plane. Above this, a liquid film approximately 40 Å thick is placed above this surface, leaving  $\sim 32$  Å of vacuum along the  $z$  direction. The surfaces themselves are simple FCC arrangements (e.g. as for NaCl) of unit charge ions with a lattice constant of 4 Å. The liquid films comprise either 1450 water molecules or 341 isopropanol molecules – for water, the SPC/E model of Berendsen *et al.* is used,[2] while for isopropanol the model of Kahn and Bruce is employed.[3] For the alcohol, all C–H and O–H bonds were treated as constraints to allow the use of a larger timestep. In the interests of simplicity in this model study, the non-Coulombic part of the interactions between the liquid molecules and any surface atom is assumed to be of the Lennard-Jones 12-6 type, with  $\sigma = 3.0$  Å and  $\epsilon = 0.6$  kJ mol<sup>-1</sup>. For each liquid simulations over five different surfaces are performed; the original charged lattice as described above (H/PHIL), a lattice where the charges of all atoms have been removed to leave a purely Lennard-Jones surface (H/PHOB), and three simulations where charges have been removed from small patches of atoms on each surface (PATCH/4, PATCH/12, and PATCH/24).

All simulations were run with a cutoff of 15 Å for the short range potential and the real-space part of the Ewald sum (reciprocal space terms encompass 16  $k$ -vectors in each Cartesian axis with convergence parameter  $\alpha = 0.23833$ ) in the Hoover NVT ensemble at 300 K with relaxation time  $\tau = 0.1$  ps. The Yeh-Berkowitz correction was applied to remove periodic artefacts influencing the system in the  $z$  direction.<sup>4</sup> Preliminary zero-Kelvin minimisation

stages with timesteps ranging from  $1 \times 10^{-7}$  to  $1 \times 10^{-4}$  were conducted in order to generate suitable starting configurations for production runs. Trajectories of 10 ns length were generated for each individual liquid / surface combination with a timestep of 1.0 fs. All quantities are calculated over the last 5 ns of the simulation.

| <b>Surface</b>      | <b>Peak 1</b> | <b>Peak 2</b> | <b>Peak 3</b> |
|---------------------|---------------|---------------|---------------|
| H/PHIL              | 7.70±2.0      | 25.02±2.7     | 9.30±2.3      |
| PATCH/4             | 8.96±2.2      | 24.25±2.5     | 8.59±2.7      |
| PATCH/12            | 12.24±2.0     | 21.68±2.4     | 7.91±2.1      |
| PATCH/24            | 15.39±2.8     | 19.66±2.9     | 6.59±2.0      |
| H/PHOB              | 0.56±0.7      | 31.78±2.2     | 8.90±2.4      |
| $z_{min}, \text{Å}$ | 0.0           | 3.75          | 4.58          |
| $z_{max}, \text{Å}$ | 3.75          | 4.58          | 6.2           |

Table 1 Populations of molecules in the individual peaks of the triplet observed for the first adsorbed layer in the case of pure isopropanol.

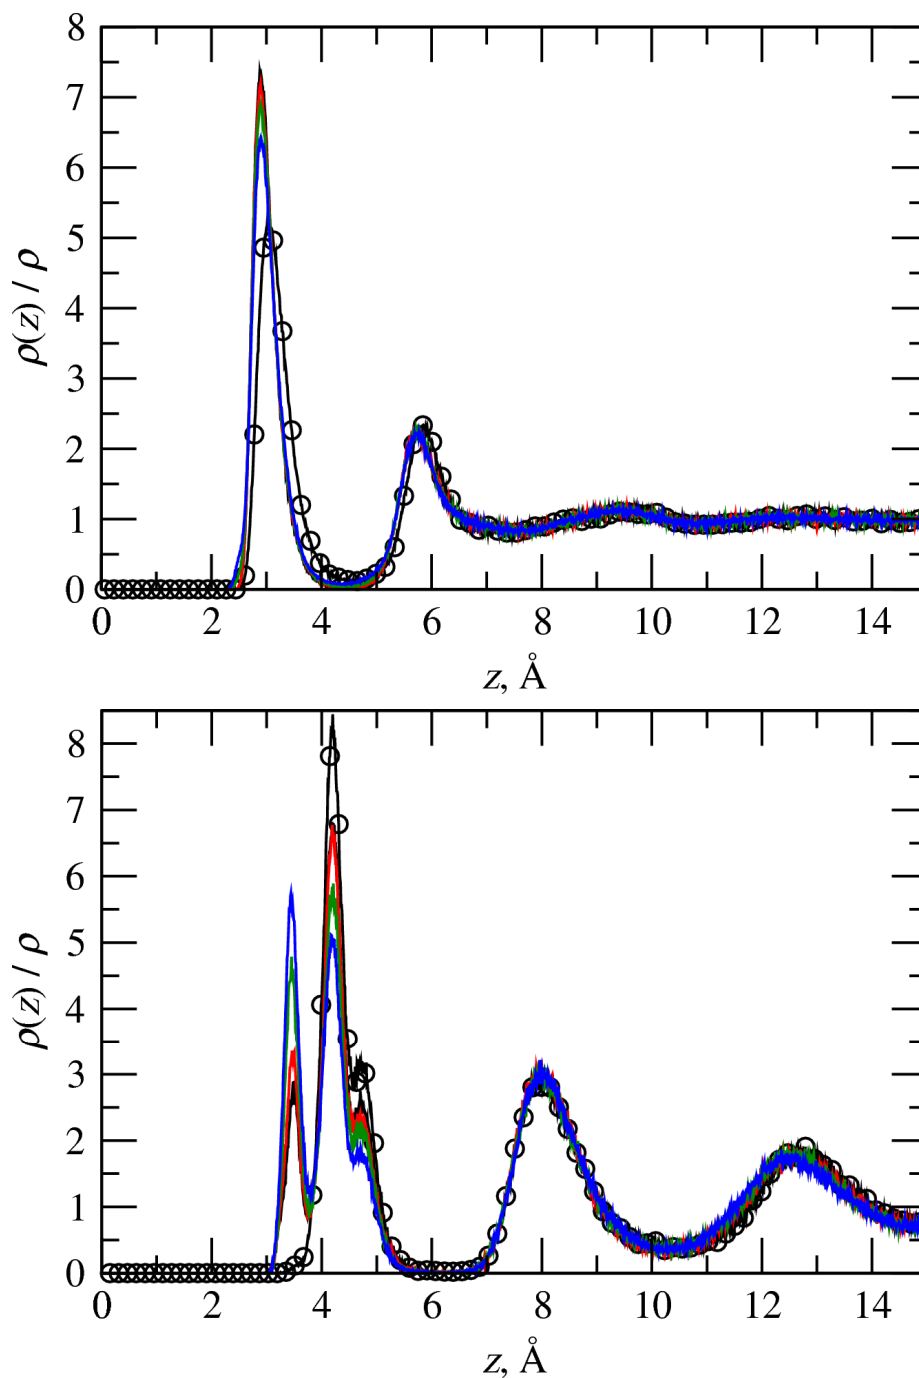

Figure 1 Normalised z-density profiles for water (top) and isopropanol (bottom) over the various surface types; H/PHIL (solid black line), PATCH/4 (red), PATCH/12 (green), PATCH/24 (blue), and H/PHOB (black line with circles). Clear oscillations of the liquid density along the surface normal are seen for all surface types up to  $\sim 12.5$  Å owing simply to the termination of the liquid phase by the presence of the surface.

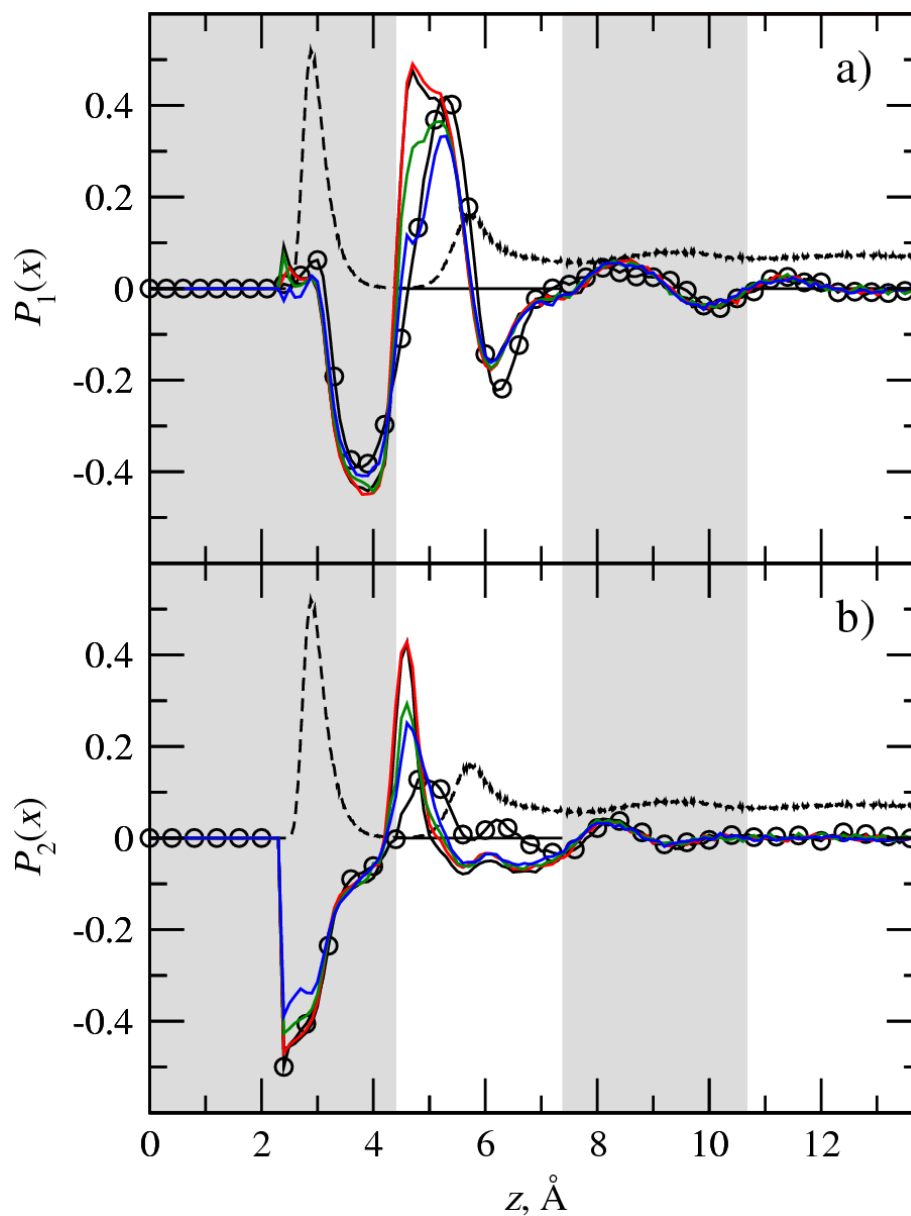

Figure 2 First- (a) and second-order (b) Legendre polynomials for the water systems calculated as a function of  $z$  ( $z = 0$  corresponds to the topmost layer of atoms in the surface); H/PHIL (solid black line), PATCH/4 (red), PATCH/12 (green), PATCH/24 (blue), and H/PHOB (black line with circles). Layers as inferred from the  $z$ -density profile (dashed black line) are indicated by alternating grey/white background.

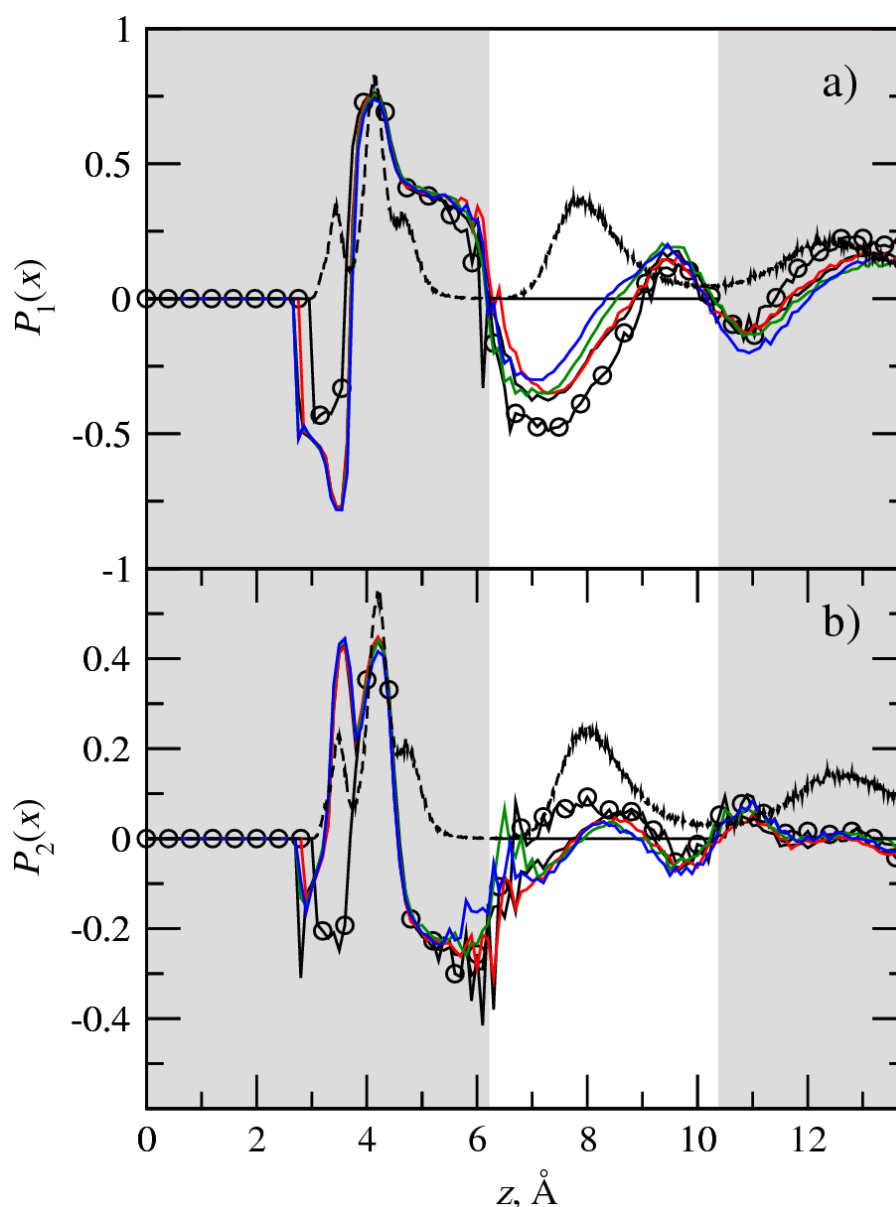

Figure 3 First- (a) and second-order (b) Legendre polynomials for the isopropanol systems calculated as a function of  $z$  ( $z = 0$  corresponds to the topmost layer of atoms in the surface); H/PHIL (solid black line), PATCH/4 (red), PATCH/12 (green), PATCH/24 (blue), and H/PHOB (black line with circles). Layers as inferred from the  $z$ -density profile (dashed black line) are indicated by alternating grey/white background.

- 1 W. Smith *Mol. Sim.* **2006**, *32*, 933–1121.
- 2 J. C. Berendsen, J. R. Grigera, T. P. Straatsma, *J. Phys. Chem.* **1987**, *91*, 6269–6271.
- 3 K. Kahn, T. C. Bruice, *J. Comp. Chem.* **2002**, *23*, 977–996..
- 4 I. Yeh, M. L. Berkowitz, *J. Chem. Phys.* **1999**, *111*, 3155–3162.
